# Supplementary material
Source: publisher figshare collection journal article supplement (https://springernature.figshare.com/ndownloader/files/16847315)
Supplement: Supplementary file 1 [file 16847315]

## Top Canonical Pathways

| Name                                           | p-value  | Overlap       |
|------------------------------------------------|----------|---------------|
| <a href="#">LXR/RXR Activation</a>             | 1.90E-28 | 17.4 % 21/121 |
| <a href="#">FXR/RXR Activation</a>             | 2.77E-26 | 15.9 % 20/126 |
| <a href="#">Acute Phase Response Signaling</a> | 1.12E-21 | 10.8 % 19/176 |
| <a href="#">Complement System</a>              | 2.98E-20 | 32.4 % 12/37  |
| <a href="#">Coagulation System</a>             | 2.06E-16 | 28.6 % 10/35  |

## Top Networks

| ID | Associated Network Functions                                                               | Score |
|----|--------------------------------------------------------------------------------------------|-------|
| 1  | Hematological System Development and Function, Organismal Functions, Hematological Disease | 55    |
| 2  | Humoral Immune Response, Inflammatory Response, Developmental Disorder                     | 38    |
| 3  | Cell Cycle, Gene Expression, Cell Death and Survival                                       | 31    |
| 4  | Carbohydrate Metabolism, Lipid Metabolism, Small Molecule Biochemistry                     | 17    |
| 5  | Endocrine System Disorders, Gastrointestinal Disease, Metabolic Disease                    | 13    |
